1 **Locally distributed abstraction of temporal distance in human parietal**

2 **cortex**

3 Qun Ye<sup>1</sup>, Yi Hu<sup>1</sup>, Yixuan Ku<sup>1,3</sup>, Kofi Appiah<sup>4</sup>, Sze Chai Kwok \*<sup>1,2,3</sup>

4

5 <sup>1.</sup> Shanghai Key Laboratory of Brain Functional Genomics, Key Laboratory of Brain Functional Genomics

6 (Ministry of Education), School of Psychology and Cognitive Science, East China Normal University,

7 Shanghai 200062, China

8 <sup>2.</sup> Shanghai Key Laboratory of Magnetic Resonance, East China Normal University, Shanghai 200062, China

9 <sup>3.</sup> NYU-ECNU Institute of Brain and Cognitive Science at NYU Shanghai, Shanghai 200062, China

10 <sup>4.</sup> Department of Computing, Faculty of ACES, Sheffield Hallam University, Sheffield S1 2NU, England

11

12 **The human brain parsimoniously situates past events by their order in relation**

13 **to time. Here, we show the posteromedial cortex geometrically abstracts the time**

14 **intervals separating pairs of event-moments in long-term, episodic memory.**

15 **Transcranial magnetic stimulation targeted at the precuneus erases these locally**

16 **distributed multivariate representations, and alters the correlation between**

17 **precuneal activity patterns and mnemonic judgements, revealing a critical role of**

18 **the precuneus in abstracting temporal distances during episodic memory**

19 **retrieval.**

20

21 Time in physics is operationally defined as “what a clock reads”. While the

22 passage of time between two moments can be precisely measured by a quartz crystal

23 oscillator or biologically registered by distributed sets of brain regions across intervals

24 of time (Buhusi & Meck, 2005; Meck, Penney, & Pouthas, 2008), the neural  
25 mechanisms that *abstract* such temporal distances separating events in long-term,  
26 episodic memory is incompletely understood (Mauk & Buonomano, 2004).

27 Representations of brief elapsed time can be inferred from single neuron  
28 activities in the primate brain (Jin, Fujii, & Graybiel, 2009; Leon & Shadlen, 2003).  
29 Time-registering neurons are found to code time with high precision in the cortico-  
30 basal ganglia circuits (Jin et al., 2009) and inferior parietal cortex (Leon & Shadlen,  
31 2003) across short timescales. In contrast, when complex, coherent experiences  
32 become consolidated into long-term memories (McGaugh, 2000), the neural circuits  
33 that build time representations as an infrastructure for episodic retrieval are theorized  
34 to be distinct from those implicated in hippocampal-dependent encoding (Ezzyat &  
35 Davachi, 2014; Manns, Howard, & Eichenbaum, 2007) and retrieval (Hsieh, Gruber,  
36 Jenkins, & Ranganath, 2014; Nielson, Smith, Sreekumar, Dennis, & Sederberg, 2015),  
37 and from those during transient temporal processing (Jin et al., 2009; Leon &  
38 Shadlen, 2003). For the recollection of long-term autobiographical memories or  
39 episodic events, the posterior medial (PM) memory system plays an instrumental role  
40 (Ranganath & Ritchey, 2012). However, the critical issue of how elapsed time  
41 between pairs of long-term episodic events – and its interplay with the encoding  
42 context – is represented by the PM system has yet to be addressed. Here we  
43 investigated the abstraction, at a macro-anatomical level, of temporal distances that  
44 were encoded more than 24 hours previously (Kwok, Shallice, & Macaluso, 2012; St  
45 Jacques, Rubin, LaBar, & Cabeza, 2008), and determined how several members of

46 this large cortical system are differentially implicated in this putative mnemonic  
47 function (Richter, Cooper, Bays, & Simons, 2016).

48 Combining functional magnetic resonance imaging (fMRI) with an interactive-  
49 video memory paradigm and a temporal order judgement task (TOJ; **Fig. 1a**)—a  
50 validated paradigm to study neural correlates underpinning temporal distances  
51 between units of memory traces (Kwok et al., 2012; Manns et al., 2007; St Jacques et  
52 al., 2008)—we adopted a two-forked protocol to ascertain how temporal distances  
53 separating pairs of past moments-in-time are represented in the human neocortex. We  
54 first investigated the neural correlates of temporal distances with a multivariate  
55 searchlight representational similarity analysis (RSA) (Nili et al., 2014) tuned to  
56 identify a locally distributed neural representation using 9-mm radius spherical  
57 searchlight. We parametrized a large set of pairs of event-moments geometrically  
58 separated by varying temporal intervals and applied RSA to compare neural  
59 representational dissimilarity matrices (RDM) with a number of parametric,  
60 condition-rich hypothetical models. Applied across the entire brain, the searchlight  
61 approach identifies local multi-voxel patterns driven by structured co-activation at a  
62 voxel or sub-voxel level within the size of the searchlight, thereby giving us a  
63 snapshot of the locally distributed neural architecture supporting temporal order  
64 judgements. To enhance the causal strength of the anatomical associations thereby  
65 revealed, we then focally disrupted the identified critical region with repetitive  
66 transcranial magnetic stimulation (rTMS), seeking to confirm its functional necessity  
67 for mediating the distributed representation of temporal distances. The spatial scale of

68 rTMS-induced disruption is comparable to that of our chosen searchlight, rendering it  
69 an optimal tool for targeted, reversible disruption of the distributed representation of  
70 interest.

71 For memory encoding, participants played an interactive video game containing  
72 seven distinct yet related chapters, each in the range of tens of minutes on day 1  
73 (**Supplementary Fig. 1, Supplementary Table 1**). By the nature of the video game,  
74 the within chapter segments contained more coherent narrative strands than those  
75 across chapters, yet all chapters were connected by a common plot. After a 24-hour  
76 retention period (day 2), on each trial, participants judged the temporal order of two  
77 images (extracted from their individually-played video game, **Fig. 1b**), depicting two  
78 time-points in their encoded memory, while their blood-oxygen-level-dependent  
79 (BOLD) activity was measured (TOJ task, **Fig. 1c**). Assuming a scale-free temporal  
80 memory representation (Kwok & Macaluso, 2015), we manipulated the between-  
81 images temporal distances (TD) for all pairs of images so that the TD distribution  
82 adhered to a power function permitting scale-invariance across subjects (Gallistel &

83 Gibbon, 2000) (60 levels of TD, Fig. 1d).

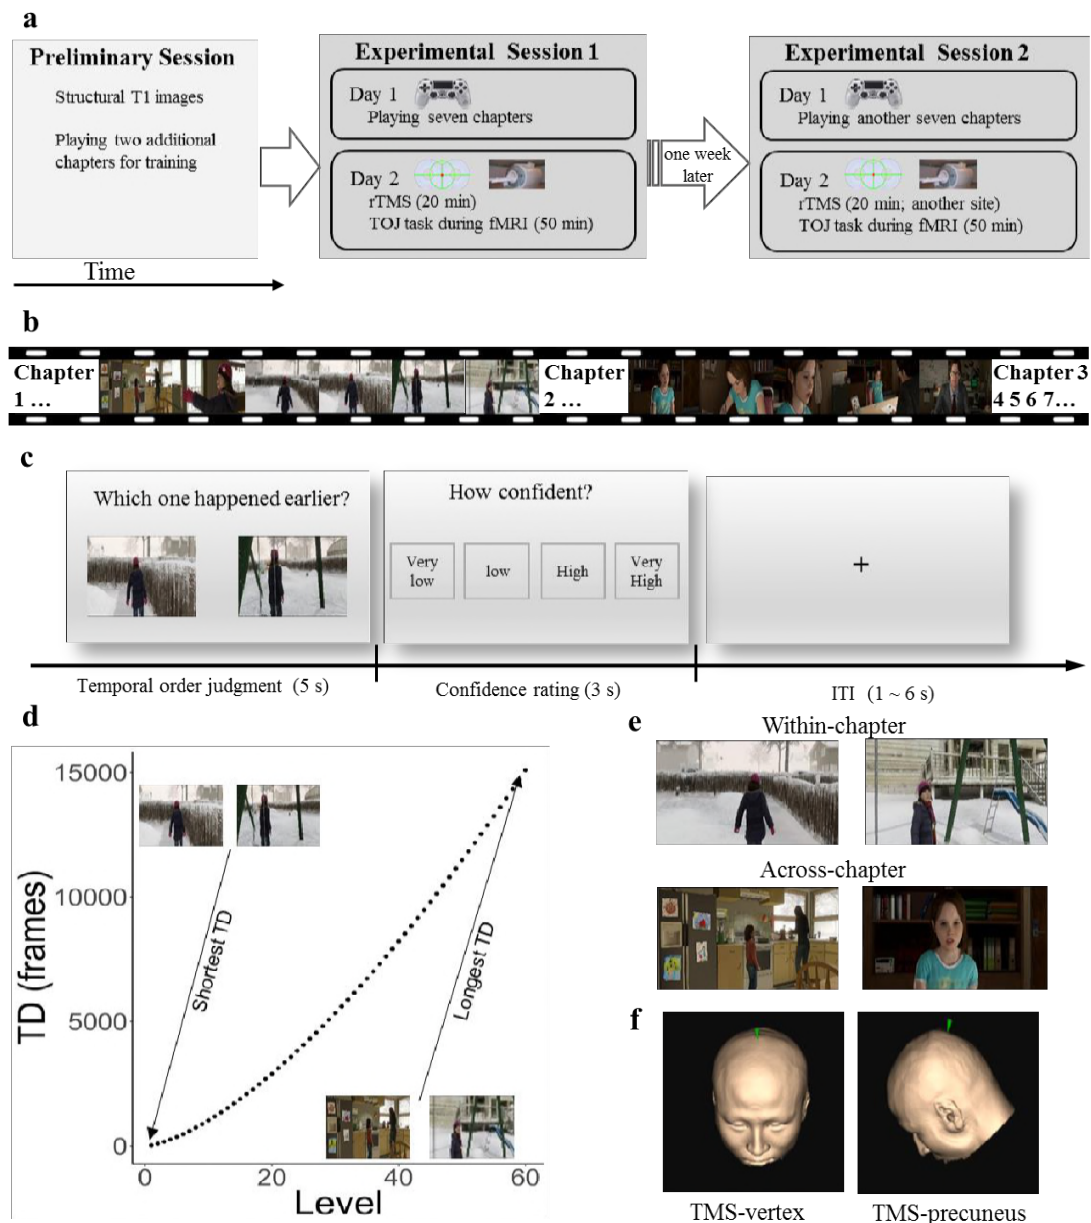

84 **Figure 1.** Experiment overview. **(a)** In experimental sessions 1 and 2, participants played a  
 85 video game containing seven related chapters with a first-person perspective for encoding,  
 86 and 24 hours later, received 20 min of repetitive transcranial magnetic stimulation (rTMS) to  
 87 either one of two cortical sites before performing a temporal order judgement task during  
 88 fMRI. Order of TMS sites (within-subjects) and choices of video game chapters were  
 89 counterbalanced across subjects (**Supplementary Table 1**). The two experimental sessions  
 90 were conducted on different days to minimize rTMS carry-over effects (mean separation = 8  
 91 days). Participants underwent structural MRI scans and familiarized themselves with the  
 92 gameplay using a console prior to experimental sessions proper. **(b)** Gameplay video: each  
 93 encoding session consisted of seven chapters (**Supplementary Fig. 1**). **(c)** Temporal order  
 94 judgement task. Participants chose the image that happened earlier in the video game and  
 95 reported their confidence level. **(d)** 60 levels of temporal distances (TD) were generated for  
 96 each subject according to their subject-specific video-playing duration. Although the absolute

97 TD were different across subjects (**Supplementary Fig. 1**), we ensured it to be scale-invariant  
98 using a power function during image selection. Actual TDs from one subject (subj01) are  
99 shown. **(e)** Two pairs of images were extracted from the same chapter (Within-chapter) or two  
100 adjacent chapters (Across-chapter). The 60 levels of TD were fully matched within-subjects  
101 for these two conditions. Note that scenes depicted in Within-chapter tended to be more  
102 contextually similar than those depicted in Across-chapter. **(f)** Stimulation sites, superimposed  
103 onto one subject's MRI-reconstructed skull, are marked by a green pointer. The MNI  
104 coordinates for precuneus stimulation:  $x, y, z = 6, -70, 44$ .

105       We first searched for neural representations resembling the matrix of temporal  
106 distances using searchlight representational similarity analysis (Nili et al., 2014).  
107 Without *a priori* bias for any region of interest, we searched the entirety of the cortex  
108 using a RDM consisting of 60 levels of logarithmically-transformed subject-specific  
109 TD, and identified voxels that contain information of the set of geometrically defined  
110 temporal distances in memory (**Fig. 2a, Online Methods and Supplementary Fig.**  
111 **2**). Within this  $60 \times 60$  matrix of moment-wise distances, we revealed that the neural  
112 pattern of judging the temporal order of a pair of memories separated with a given  
113 temporal distance is more similar to other temporal order judgements which enclosed  
114 temporal distances of a comparable scale. These voxels were in the posteromedial  
115 parietal areas, bilateral angular gyri, and middle frontal gyri (**Fig. 2b, Supplementary**  
116 **Table 2**). The scale-invariance of the design allowed us to generalize the resultant  
117 mnemonic abstraction of temporal distances across individuals, in line with the scale-  
118 free representation of time (Gallistel & Gibbon, 2000).

119       The temporal-distance memory representation could be confounded by perceptual  
120 similarity in each pair of images. To address this concern, we conducted three  
121 separate RSAs, in which we indexed perceptual similarity between the pairs by three  
122 different metrics: RGB cross-correlation RDM, RGB-intensity RDM, and RGB-

123 histogram RDM. No similar representation was observed in the posteromedial parietal  
124 cortex using these candidate RDMs, suggesting that our results could not be driven  
125 simply by the image properties (rows 3 – 5, **Supplementary Fig. 3**). To reinforce the  
126 point, considering previous work on space-time relationships in memory (Deuker,  
127 Bellmund, Navarro Schroder, & Doeller, 2016; Nielson et al., 2015), we also  
128 computed the number of locations each participant had virtually traversed in the  
129 video, quantified the space displacement embedded between the paired images, and  
130 entered them into subject-specific Situational Changes RDM (**Supplementary Fig.**  
131 **4**). The searchlight RSA results showed the pattern representation observed in **Figure**  
132 **2b** can be better accounted for by temporal-distance embedded between the images  
133 than by spatial-distance that participants had travelled (rows 2, **Supplementary Fig.**  
134 **3**). Inferential statistical comparisons of multiple models showed that the neural  
135 signals in the selected conjunction ROI (see below) were most attributable to the  
136 mnemonic representation of the moment-wise comparison of multiple temporal  
137 distances (**Supplementary Fig. 5**).

138       Having identified a multivariate pattern underlying the temporal memory  
139 abstraction in the posterior medial parietal cortex (**Fig. 2b**), we probed further  
140 whether there were voxels whose activities change monotonically as a function of  
141 temporal distance, irrespective of any locally distributed representation. Whole-brain  
142 parametric modulation analysis (pmod) revealed TD-specific BOLD signals in a  
143 cluster within the posteromedial region, including the precuneus (**Fig. 2c**,  
144 **Supplementary Table 3**). This relationship could not be attributed to difficulty



145 (results were same after trial-by-trial reaction times were accounted for,  
146 **Supplementary Fig. 6a**). Since the two types of analysis extracted two different  
147 kinds of neurally-encoded information, their overlap in the precuneus strengthens the  
148 claim to a critical role for the region. We accordingly created a conjunction map (**Fig.**  
149 **2d**), so that both the multivariate and univariate results underlying the temporal  
150 distance abstraction would be available for the next analysis.

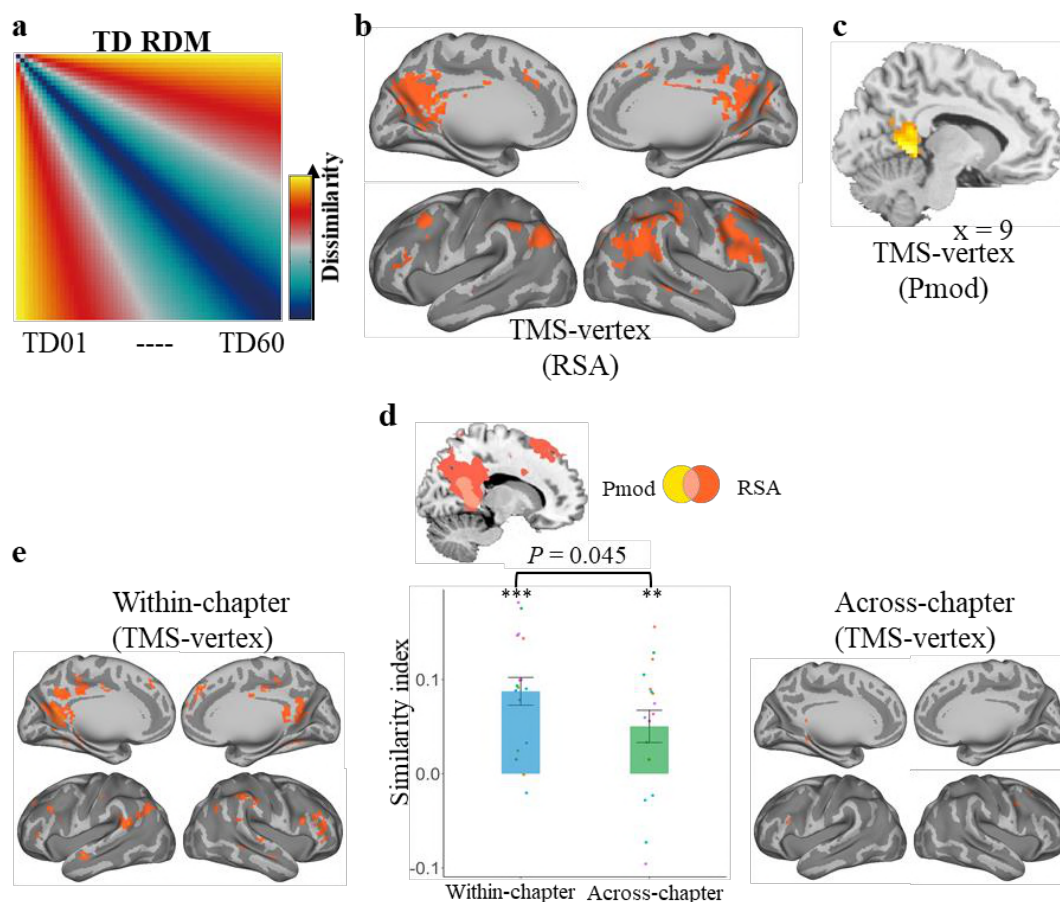

151  
152 **Figure 2.** Abstraction of temporal distances in posteromedial cortex. **(a)** TD representational  
153 dissimilarity matrix (RDM) for searchlight RSA. The RDM consisted of 60 subject-specific  
154 TD levels. Any two event-moments that are separated by short TD will get increasingly  
155 dissimilar with other two event-moments as the TD increases. **(b)** Using TD RDM for  
156 searchlight RSA, clusters of voxels that contained TD information were primarily in the  
157 posteromedial cortex, bilateral angular gyri and bilateral middle frontal gyri. **(c)** Activation  
158 signal intensity from parametric modulation analysis (pmod). The intensity of these voxels,  
159 primarily in the left precuneus, increased as a function of TD. **(d)** Conjunction mask. The  
160 mask was created by intersecting the activation map from pmod and similarity map from RSA



161 **(Supplementary Tables 2 and 3). (e)** Stronger multivoxel similarity representing TD  
162 variation in Within-chapter condition than in Across-chapter condition in the conjunction  
163 region (one-side:  $P = 0.045$ , \*\*  $P < 0.01$ ; \*\*\*  $P < 0.001$ ). Results were consistent when the  
164 masks were created using more robust, bias-free leave-one-subject-out method (one-side:  $P =$   
165  $0.040$ ). MRI results are displayed at  $P_{\text{uncorrected}} < 0.001$ .

166 Temporal distance or proximity is intertwined with the construct of context. A  
167 prominent memory model posits that item representations are linked to a changing  
168 “context” at encoding, such that a common retrieved context is triggered during recall  
169 for items that were experienced within a similar temporal context (Polyn, Norman, &  
170 Kahana, 2009). This theory predicts the TD-neural representation pattern similarity  
171 index to be higher when the two event-moment images are extracted from a “similar  
172 context” than when they are from two “different contexts”. To test this, we  
173 manipulated the factor “context” by controlling whether the paired images presented  
174 at TOJ task were extracted from the same chapters or two adjacent chapters of the  
175 video game while keeping the 60 TDs fully matched between the two conditions  
176 (Within-chapter vs. Across-chapter, **Fig. 1e**). We re-ran the searchlight RSA, now  
177 separately for the Within-chapter and Across-chapter trials. The representation of TD  
178 was observed only in the Within-chapter condition but not in the Across-chapter  
179 condition (**Fig. 2e**, right). The identified voxels were in the precuneus, retrosplenial  
180 cortex, and angular gyri bilaterally (**Fig. 2e** left). For statistical inference, we  
181 extracted the similarity index with the conjunction mask combining the RSA and  
182 pmod maps which contained the TD-modulated signals from each subject for  
183 comparison (**Fig. 2d** and **Online Methods**). In line with our prediction, the voxels in  
184 the Within-chapter trials contained higher pattern similarity to the TD RDM than  
185 Across-chapter trials (**Fig. 2e**, middle panel; one-side:  $P = 0.045$ ), confirming the

186 neural pattern similarity related to the TD RDM was indeed stronger in Within-  
187 chapter trials. This difference was also found in a voxel-wise univariate analysis. The  
188 beta-estimates ( $\beta$ ) from pmod analyses using TD as a regressor were significantly  
189 higher in the Within-chapter condition (“Within-chapter > Across-chapter”  $P = 0.005$   
190 with RT effects regressed out, **Supplementary Fig. 6c-d**). This confirmed the  
191 mnemonic representation of temporal distances was determined by whether the pairs  
192 of images were experienced within a similar context, corroborating the interaction  
193 between temporally- and semantically-defined factors observed during memory  
194 encoding (Ezzyat & Davachi, 2014) and retrieval (Hsieh et al., 2014).

195 To strengthen the claim to a pivotal role of the precuneus in this operation we  
196 strategically deployed a disruptive technique, targeting it with repetitive transcranial  
197 magnetic stimulation to interrogate changes on both neural and behavioral levels  
198 (within-subjects: TMS-precuneus vs. TMS-vertex; **Fig. 1f** and **Supplementary Table**  
199 **1**). Strikingly, in the fMRI session of which subjects’ precuneus had received TMS  
200 stimulation immediately prior to TOJ, the widespread representation of TD was  
201 eradicated (rows 1, **Supplementary Fig. 3**). To the best of our knowledge, no study  
202 has previously demonstrated such sharp susceptibility to TMS of such mnemonic  
203 representations. The multivariate representations were more vulnerable than the  
204 conventional, activation-based analyses: TMS to the precuneus did not induce any  
205 discernable changes in the univariate BOLD intensity (**Supplementary Fig. 7**).  
206 Altogether, these findings strengthen our argument that memory traces that are  
207 represented during temporal order judgement are indeed conveyed in some localized

208 multivoxel readouts housed in the PM system cortices, above and beyond the  
209 modulated changes in canonical BOLD activation.

210 In light of the fractionation view for the parietal cortex (Nelson, McDermott, &  
211 Petersen, 2012), we further tested the hypothesis that there might be differences in the  
212 patterns of neural activity associated with the abstraction of temporal distances in the  
213 sub-regions of the PM memory network (Ranganath & Ritchey, 2012). Based on our  
214 results (**Fig. 2b** and **Supplementary Table 2**) and previous work on the parcellation  
215 of the PM memory network (Richter et al., 2016), we chose six anatomical regions-of-  
216 interest in the PM memory network (ROIs: bilateral precuneus, bilateral angular gyrus  
217 and bilateral hippocampus; see **Online Methods**), together with the primary visual  
218 region (entire occipital cortex) as a control, to test for the disruptive effect caused by  
219 the TMS. We extracted the similarity indices from these ROIs and found that the  
220 neural-TD pattern similarity was significantly weakened in the left precuneus  
221 following TMS to the precuneus (**Fig. 3**; and to a lesser extent also the left angular  
222 gyrus, **Supplementary Fig. 8**). Such differences were not obtained in the other ROIs  
223 (**Supplementary Fig. 8**). Moreover, we found that changes in individuals' neural-TD  
224 pattern similarity in the vertex condition to be associated positively with their TOJ  
225 memory performance in this key region (also in the hippocampi, see **Supplementary**  
226 **Fig. 8**), implying the multivoxel representations are important neurobiological  
227 prerequisites for the ability to support temporal order judgement. However, disrupting  
228 the precuneus with magnetic field prior to retrieval put this neural-behavioral  
229 correlation into disarray (**Fig. 3**) and slowed response times (**Supplementary Fig. 9**),

230 indicating the removal of the TD representations from the precuneal voxels would  
231 causally result in overt memory performance changes. Since the focal perturbation  
232 altered the mnemonic representation in the precuneus, the angular gyri and the  
233 hippocampi, it implied the disruption might have been effective through inducing  
234 alternation in functional connectivity between multiple regions, or more globally  
235 throughout the entire parietal memory network (Nilakantan, Bridge, Gagnon,  
236 VanHaerents, & Voss, 2017; Wang et al., 2014).

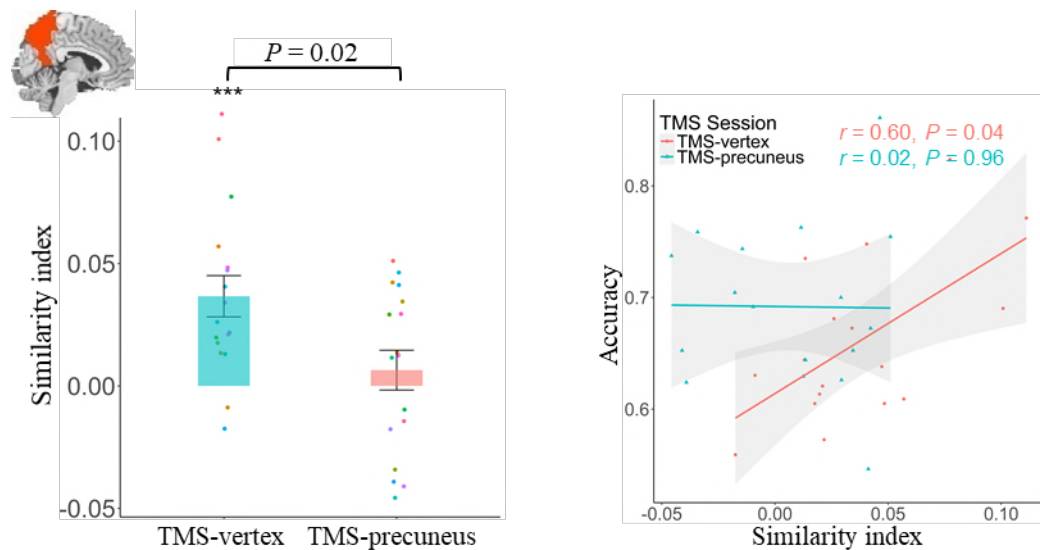

237  
238 **Figure 3.** TMS erases precuneal representation of temporal distances. Focal magnetic pulses  
239 reduced the pattern similarity index in left precuneus (left panel) and altered correlational  
240 pattern between neural pattern similarity index and TOJ memory accuracy across participants  
241 (only Within-chapter trials considered, right panel).  $P$  values are FDR-corrected.

242 The present parietal representation of temporal distances between pairs of  
243 episodic events, as revealed by both univariate and multivariate pattern analyses,  
244 might act in parallel with hippocampal cells that code specific moments in time or  
245 temporal positions (Eichenbaum, 2014), or act independently as a separate mnemonic  
246 establishment of episodes over and above the hippocampal memory ensemble (Brodt  
247 et al., 2016). The current findings align with the temporal context model (Polyn et al.,

248 2009) that the fine-grained TD memory information distributed in this cortex is  
249 comprehensively stronger when paired images were associated within the similar  
250 context. Building on extant connectivity findings between the hippocampus and  
251 neocortical regions (Moscovitch, Cabeza, Winocur, & Nadel, 2016; Ranganath &  
252 Ritchey, 2012; Vincent et al., 2006) and the hippocampal role in temporal context  
253 memory (Ezzyat & Davachi, 2014; Hsieh et al., 2014), our demonstration of  
254 distributed pattern of temporal information in the posteromedial parietal region  
255 implied the existence of a higher level parietal mnemonic readout of temporal  
256 distances between episodic experiences.

257 In summary, our multivariate searchlight results reveal that the temporal distance  
258 representations in the posterior parietal cortex, especially the precuneus, during TOJ  
259 retrieval are determined by how distant (and how similar the encoding contexts) two  
260 given event-moments the subjects had encountered (Kwok et al., 2012; St Jacques et  
261 al., 2008). We also establish that this multivoxel mnemonic abstraction is localized in  
262 the precuneal area and perturbation to it alters the neural—behavior relationship  
263 across the global parietal memory network, assigning this structure as a locus of  
264 flexibly effecting the manipulation of physical time during episodic memory retrieval.

265

266

267 SUPPLEMENTAL INFORMATION

268 Supplemental Information includes nine figures and three tables.

269

270 AUTHOR CONTRIBUTIONS

271 Q.Y. designed and conducted the experiments, analyzed data, and wrote the manuscript. Y.H.  
272 discussed the results and commented on drafts. Y.K. advised on TMS protocol. K.A. produced  
273 indices for RDM Models 4 and 5. S.C.K. conceived and designed the study, acquired funding,  
274 supervised the project, and wrote the manuscript.

275

276 ACKNOWLEDGMENTS

277 This research is sponsored by the National Natural Science Foundation of China 31371052 (Y.H.),  
278 by the Ministry of Education of PRC Humanities and Social Sciences Research grant 16YJC190006,  
279 STCSM Shanghai Pujiang Program 16PJ1402800, STCSM Natural Science Foundation of  
280 Shanghai 16ZR1410200, Large Instruments Open Foundation (ECNU), and NYU Shanghai and the  
281 NYU-ECNU Institute of Brain and Cognitive Science at NYU Shanghai (S.C.K.).

282

283 COMPETING FINANCIAL INTERESTS

284 The authors declare no competing financial interests.

285

286 REFERENCES

- 287 Bonni, S., Veniero, D., Mastropasqua, C., Ponzo, V., Caltagirone, C., Bozzali, M., & Koch, G.  
288 (2015). TMS evidence for a selective role of the precuneus in source memory retrieval.  
289 *Behav Brain Res*, 282, 70-75. doi:10.1016/j.bbr.2014.12.032
- 290 Brodt, S., Pohlchen, D., Flanagan, V. L., Glasauer, S., Gais, S., & Schonauer, M. (2016). Rapid and  
291 independent memory formation in the parietal cortex. *Proc Natl Acad Sci U S A*, 113(46),  
292 13251-13256. doi:10.1073/pnas.1605719113
- 293 Buhusi, C. V., & Meck, W. H. (2005). What makes us tick? Functional and neural mechanisms of  
294 interval timing. *Nat Rev Neurosci*, 6(10), 755-765. doi:10.1038/nrn1764
- 295 Deuker, L., Bellmund, J. L., Navarro Schroder, T., & Doeller, C. F. (2016). An event map of memory  
296 space in the hippocampus. *Elife*, 5. doi:10.7554/eLife.16534
- 297 Eichenbaum, H. (2014). Time cells in the hippocampus: a new dimension for mapping memories.  
298 *Nat Rev Neurosci*, 15(11), 732-744. doi:10.1038/nrn3827
- 299 Esterman, M., Tamber-Rosenau, B. J., Chiu, Y. C., & Yantis, S. (2010). Avoiding non-independence  
300 in fMRI data analysis: leave one subject out. *Neuroimage*, 50(2), 572-576.  
301 doi:10.1016/j.neuroimage.2009.10.092
- 302 Ezzyat, Y., & Davachi, L. (2014). Similarity breeds proximity: pattern similarity within and across  
303 contexts is related to later mnemonic judgments of temporal proximity. *Neuron*, 81(5),  
304 1179-1189. doi:10.1016/j.neuron.2014.01.042
- 305 Friston, K. J., Penny, W., Phillips, C., Kiebel, S., Hinton, G., & Ashburner, J. (2002). Classical and  
306 Bayesian inference in neuroimaging: theory. *Neuroimage*, 16(2), 465-483.  
307 doi:10.1006/nimg.2002.1090
- 308 Gallistel, C. R., & Gibbon, J. (2000). Time, rate, and conditioning. *Psychol Rev*, 107(2), 289-344.
- 309 Hsieh, L. T., Gruber, M. J., Jenkins, L. J., & Ranganath, C. (2014). Hippocampal activity patterns  
310 carry information about objects in temporal context. *Neuron*, 81(5), 1165-1178.

- 311 doi:10.1016/j.neuron.2014.01.015
- 312 Jin, D. Z., Fujii, N., & Graybiel, A. M. (2009). Neural representation of time in cortico-basal ganglia  
313 circuits. *Proc Natl Acad Sci U S A*, *106*(45), 19156-19161. doi:10.1073/pnas.0909881106
- 314 Kraft, A., Dyrholm, M., Kehrer, S., Kaufmann, C., Bruening, J., Kathmann, N., Bundesen, C.,  
315 Irlbacher, K., & Brandt, S. A. (2015). TMS over the right precuneus reduces the bilateral  
316 field advantage in visual short term memory capacity. *Brain Stimul*, *8*(2), 216-223.  
317 doi:10.1016/j.brs.2014.11.004
- 318 Kwok, S. C., & Macaluso, E. (2015). Scale invariance of temporal order discrimination using  
319 complex, naturalistic events. *Cognition*, *140*, 111-121.  
320 doi:10.1016/j.cognition.2015.04.007
- 321 Kwok, S. C., Shallice, T., & Macaluso, E. (2012). Functional anatomy of temporal organisation and  
322 domain-specificity of episodic memory retrieval. *Neuropsychologia*, *50*(12), 2943-2955.  
323 doi:10.1016/j.neuropsychologia.2012.07.025
- 324 Leon, M. I., & Shadlen, M. N. (2003). Representation of time by neurons in the posterior parietal  
325 cortex of the macaque. *Neuron*, *38*(2), 317-327.
- 326 Mancini, M., Mastropasqua, C., Bonni, S., Ponzo, V., Cercignani, M., Conforto, S., Koch, G., &  
327 Bozzali, M. (2017). Theta Burst Stimulation of the Precuneus Modulates Resting State  
328 Connectivity in the Left Temporal Pole. *Brain Topogr*, *30*(3), 312-319. doi:10.1007/s10548-  
329 017-0559-x
- 330 Manns, J. R., Howard, M. W., & Eichenbaum, H. (2007). Gradual changes in hippocampal activity  
331 support remembering the order of events. *Neuron*, *56*(3), 530-540.  
332 doi:10.1016/j.neuron.2007.08.017
- 333 Mauk, M. D., & Buonomano, D. V. (2004). The neural basis of temporal processing. *Annu Rev*  
334 *Neurosci*, *27*, 307-340. doi:10.1146/annurev.neuro.27.070203.144247
- 335 McGaugh, J. L. (2000). Memory--a century of consolidation. *Science*, *287*(5451), 248-251.
- 336 Meck, W. H., Penney, T. B., & Pouthas, V. (2008). Cortico-striatal representation of time in animals  
337 and humans. *Curr Opin Neurobiol*, *18*(2), 145-152. doi:10.1016/j.conb.2008.08.002
- 338 Moscovitch, M., Cabeza, R., Winocur, G., & Nadel, L. (2016). Episodic Memory and Beyond: The  
339 Hippocampus and Neocortex in Transformation. *Annu Rev Psychol*, *67*, 105-134.  
340 doi:10.1146/annurev-psych-113011-143733
- 341 Nelson, S. M., McDermott, K. B., & Petersen, S. E. (2012). In favor of a 'fractionation' view of  
342 ventral parietal cortex: comment on Cabeza et al. *Trends Cogn Sci*, *16*(8), 399-400; author  
343 reply 400-391. doi:10.1016/j.tics.2012.06.014
- 344 Nielson, D. M., Smith, T. A., Sreekumar, V., Dennis, S., & Sederberg, P. B. (2015). Human  
345 hippocampus represents space and time during retrieval of real-world memories. *Proc Natl*  
346 *Acad Sci U S A*, *112*(35), 11078-11083. doi:10.1073/pnas.1507104112
- 347 Nilakantan, A. S., Bridge, D. J., Gagnon, E. P., VanHaerents, S. A., & Voss, J. L. (2017). Stimulation  
348 of the Posterior Cortical-Hippocampal Network Enhances Precision of Memory  
349 Recollection. *Curr Biol*, *27*(3), 465-470. doi:10.1016/j.cub.2016.12.042
- 350 Nili, H., Wingfield, C., Walther, A., Su, L., Marslen-Wilson, W., & Kriegeskorte, N. (2014). A  
351 toolbox for representational similarity analysis. *PLoS Comput Biol*, *10*(4), e1003553.  
352 doi:10.1371/journal.pcbi.1003553
- 353 Penny, W., & Holmes, A. (2004). Random-Effects Analysis. In S. J. R. Frackowiak, J. K. Friston,  
354 D. C. Frith, J. R. Dolan, J. C. Price, S. Zeki, T. J. Ashburner, & D. W. Penny (Eds.), *Human*



- 355 *Brain Function* (Second Edition ed., pp. pp.843-850): Elsevier.
- 356 Polyn, S. M., Norman, K. A., & Kahana, M. J. (2009). A context maintenance and retrieval model  
357 of organizational processes in free recall. *Psychol Rev*, *116*(1), 129-156.  
358 doi:10.1037/a0014420
- 359 Ranganath, C., & Ritchey, M. (2012). Two cortical systems for memory-guided behaviour. *Nat Rev*  
360 *Neurosci*, *13*(10), 713-726. doi:10.1038/nrn3338
- 361 Richter, F. R., Cooper, R. A., Bays, P. M., & Simons, J. S. (2016). Distinct neural mechanisms  
362 underlie the success, precision, and vividness of episodic memory. *Elife*, *5*.  
363 doi:10.7554/eLife.18260
- 364 Rossi, S., Hallett, M., Rossini, P. M., Pascual-Leone, A., & Safety of, T. M. S. C. G. (2009). Safety,  
365 ethical considerations, and application guidelines for the use of transcranial magnetic  
366 stimulation in clinical practice and research. *Clin Neurophysiol*, *120*(12), 2008-2039.  
367 doi:10.1016/j.clinph.2009.08.016
- 368 St Jacques, P., Rubin, D. C., LaBar, K. S., & Cabeza, R. (2008). The short and long of it: neural  
369 correlates of temporal-order memory for autobiographical events. *J Cogn Neurosci*, *20*(7),  
370 1327-1341. doi:10.1162/jocn.2008.20091
- 371 Talairach, J., & Tournoux, P. (1988). *Co-planar stereotaxic atlas of the human brain. 3-Dimensional*  
372 *proportional system: an approach to cerebral imaging*: Thieme.
- 373 Tzourio-Mazoyer, N., Landeau, B., Papathanassiou, D., Crivello, F., Etard, O., Delcroix, N.,  
374 Mazoyer, B., & Joliot, M. (2002). Automated anatomical labeling of activations in SPM  
375 using a macroscopic anatomical parcellation of the MNI MRI single-subject brain.  
376 *Neuroimage*, *15*(1), 273-289. doi:10.1006/nimg.2001.0978
- 377 Vincent, J. L., Snyder, A. Z., Fox, M. D., Shannon, B. J., Andrews, J. R., Raichle, M. E., & Buckner,  
378 R. L. (2006). Coherent spontaneous activity identifies a hippocampal-parietal memory  
379 network. *J Neurophysiol*, *96*(6), 3517-3531. doi:10.1152/jn.00048.2006
- 380 Wang, J. X., Rogers, L. M., Gross, E. Z., Ryals, A. J., Dokucu, M. E., Brandstatt, K. L., Hermiller,  
381 M. S., & Voss, J. L. (2014). Targeted enhancement of cortical-hippocampal brain networks  
382 and associative memory. *Science*, *345*(6200), 1054-1057. doi:10.1126/science.1252900  
383

## 384 METHODS

385 **Participants.** Twenty individuals participated in the study (7 female,  $22.55 \pm 1.54$  years, mean  $\pm$  sd). Data from 3  
386 subjects were excluded due to either poor performance (1 subject performed at chance level) or scanner malfunction  
387 (projector crashed during scanning for 2 subjects at TMS-vertex session), resulting in a final group of 17 subjects (7  
388 female,  $20.65 \pm 1.54$  years, mean  $\pm$  sd). All subjects were unfamiliar with the video game, had normal or correct-to-  
389 normal vision and did not report neurological or psychiatric disorders or current use of psychoactive drugs. All  
390 subjects were eligible for MRI and TMS procedures based on standard MRI safety screening as well as on their  
391 answers to a TMS safety-screening questionnaire (Rossi, Hallett, Rossini, Pascual-Leone, & Safety of, 2009). No  
392 subjects withdrew due to complication from the TMS or MRI procedures, and no negative treatment responses were  
393 observed. All subjects gave written informed consent and were compensated for their participation. All procedures  
394 were performed in accordance with the 1964 Helsinki declaration and its later amendments and approved by  
395 University Committee on Human Research Protection of East China Normal University (UHRP-ECNU). The  
396 number of participants was determined based on previous studies with similar design (Ezzyat & Davachi, 2014;  
397 Wang et al., 2014).

398  
399 **Experimental design, stimuli, and tasks.** *Encoding: Interactive video game.* The action-adventure video game  
400 (*Beyond: Two Souls*) was created by the French game developer Quantic Dream and played in the PlayStation 4  
401 video game console developed by Sony Computer Entertainment. Participants played the game using a first-person  
402 perspective. In order to ensure the participants master the operational capability, they were trained to play the game  
403 with two additional game chapters (Training chapters: Welcome to the CIA, and The Embassy). The training session  
404 varied in duration depending on the dexterity of each participant on using the console (40 – 60 min per chapter).  
405 After the training session, participants played 14 chapters in total across two sessions: 7 in Experimental Session 1  
406 and then another 7 in Session 2 (**Fig. 1**). The video game they played were recorded and stored as a single video file  
407 in MP4 format (Chapters 1~7: My Imaginary Friend, First Interview, First Night, Alone, The Experiment, Night  
408 Session, Hauntings; Chapters 8~14: The Party, Like Other Girls, Separation, Old Friends, Norah, Agreement,  
409 Briefing; see **Supplementary Fig. 1**).

410 *Retrieval (scanned): Temporal Order Judgment (TOJ) task.* The TOJ retrieval task required participants to  
411 choose the image that happened earlier in the video game they had encoded. The task was administrated inside an  
412 MRI scanner, where visual stimuli were presented using E-prime software (Psychology Software Tools, Inc.,  
413 Pittsburgh, PA), as back-projected via a mirror system to the participant. Each trial was presented for 5 s during  
414 which participants performed the temporal order judgment. They were then allowed 3 s to report their confidence  
415 level following the memory judgement. Participants performed the TOJ task using their index and middle fingers of  
416 one of their hands via an MRI compatible five-button response keyboard (Sinorad, Shenzhen, China). Participants  
417 reported their confidence level (“Very Low”, “Low”, “High”, or “Very High”) regarding their own judgment of the  
418 correctness of TOJ with four fingers (thumb was not used) of the other hand. The left/right hand response  
419 contingency was counterbalanced across participants. Participants were told they should report their confidence level  
420 in a relative way and make use of the whole confidence scale. Following these judgments, a fixation cross with a  
421 variable duration (1 – 6 s) was presented. Each participant completed 240 trials in each of the two experimental  
422 sessions. Participants were given 15 practice trials using paired images extracted from the two additional chapters  
423 they had played in the training session out of the scanner to ensure they understand the task procedure. Participants  
424 completed a surprise recognition test after TOJ task outside scanner; data of which are not reported here.

425 For the TOJ task, we selected static images from the subject-specific recorded videos which the participants  
426 had played the day before. Each second in the video consisted of 29.97 static images (frames). For each game-  
427 playing session, 240 pairs of images were extracted from the seven chapters and were paired up for the task based

428 on the following criteria: (1) the two images had to be extracted from either the same chapters or adjacent chapters  
429 (Within- vs. Across-chapter condition); (2) the temporal distance (TD) between the two images were matched  
430 between Within- and Across-chapter condition; (3) in order to maximize the TD, we first selected the second longest  
431 chapter of the video and determined the longest TD according to a power function (power = 1.5), at the same time  
432 ensuring the shortest TD to be longer than 30 frames. We generated 60 progressive levels of TD among these pairs  
433 (each level repeated twice). In sum, three within-subjects factors regarding the TOJ retrieval task were manipulated:  
434 (1) 60 TD levels permitting scale-invariance across subjects between two images (see below); (2) Context (two  
435 images extracted from either Within- or Across-chapter); (3) TMS stimulation (TMS-precuneus vs. TMS-vertex, see  
436 below).

437 *Selection of 60 levels of temporal distances (TDs).* In order to maximize the range of all TDs, we first selected  
438 the second longest chapter of the video game and determined the longest TD ( $L$ ), while ensuring the shortest TD to  
439 be longer than 30 frames. The 60 TD levels were selected according to this function,

$$440 \quad TD_n = L * \left(\frac{n}{60}\right)^{1.5},$$

441 where  $L$  denotes duration of the second longest chapter of the video game in each experimental session,  $n$   
442 denotes TD level, and value of  $TD_n$  were rounded to the nearest integer using the “round” function in MATLAB.  
443 Note that the actual TDs were different across subjects, but since we applied a power function, the scale was thus  
444 rendered invariant (Kwok & Macaluso, 2015). Image-pairs extraction from each of the chapters were independently  
445 conducted across subjects. The numbers of images-pairs extracted from each of the chapters were approximately  
446 equal within-subjects.

447

448 **Transcranial magnetic stimulation. TMS procedure and protocol.** TMS were applied using a 70 mm Double Air  
449 Film Coil connected to a Magstim Rapid2 (The Magstim Company, Ltd., Whitland, UK). In order to localize the  
450 target brain regions precisely, we obtained individual anatomical T1-weighted magnetic resonance images and then  
451 imported them into BrainSight (Rogue Research Inc., Montreal, Canada) for stereotaxic registration of the TMS coil  
452 with the participants’ brain. The position of the coil and the subject’s head were co-registered with BrainSight, and  
453 monitored using a Polaris Optical Tracking System (Northern Digital, Waterloo, Canada) during TMS. Positional  
454 data for both rigid bodies were registered in real time to a common frame of reference and were superimposed onto  
455 the reconstructed three-dimensional MRI images of the subject using the BrainSight. The center of the coil was  
456 continuously monitored to be directly over the site of interest. For all sites (vertex, precuneus, and motor areas for  
457 measuring active motor threshold), the TMS coil was held tangential to the surface of the skull and was placed in a  
458 rostro-caudal direction. An adjustable frame was used to hold the TMS coil firmly in place, while the participants  
459 rested their heads on the chin rest. Head movements were monitored constantly by BrainSight and were negligible.  
460 We measured subjects’ active motor threshold, defined as the lowest TMS intensity delivered over the motor cortex  
461 necessary to elicit visible twitches of the right index finger in at least 5 out of 10 consecutive pulses. The location  
462 used to determine the active motor threshold was identified with a single pulse of TMS over the motor cortex at the  
463 left hemisphere. The TMS coil was systematically moved until the optimal cortical site was located to induce the  
464 largest and most reliable motor response; this stimulus output was then recorded. The TMS intensity was then  
465 calibrated at 110% of individual active motor threshold (stimulator output:  $75.2 \pm 6.9\%$ , mean  $\pm$  se, range from 63%  
466 to 88%, **Supplementary Table 1**). In Experimental Session 1 and 2, the TMS was applied at a low-frequency rate  
467 of 1 Hz with an uninterrupted duration of 20 min.

468 *TMS stimulation sites.* The target stimulation was delivered to the precuneus (Kwok et al., 2012) (MNI  $x, y, z =$   
469  $6, -70, 44$ ), whereas the control stimulation was delivered to the vertex. The vertex was defined individually by the  
470 point of the same distance to the left and the right pre-auricular, and of the same distance to the nasion and theinion.  
471 Due to the folding of the two cerebral hemispheres, the stimulated vertex site lies at a considerable distance from the

472 TMS coil, thereby diminishing the effectiveness of the magnetic pulses. Stimulating the vertex is not known to  
473 produce any memory task-relevant effects and deemed as a reliable control site. Stimulation magnitude and protocols  
474 in the present study were comparable to those used in similar studies that are robust to produce significant memory-  
475 related changes by targeting at the precuneus (Bonni et al., 2015; Kraft et al., 2015; Mancini et al., 2017) or lateral  
476 parietal cortices (Nilakantan et al., 2017; Wang et al., 2014). Immediately after the end of the stimulation, participants  
477 performed four runs of Temporal Order Judgment task in the MRI scanner (delay period between the end of TMS  
478 and the beginning of MRI:  $M_{\text{precuneus}} = 15.29$  min,  $M_{\text{vertex}} = 20.76$  min,  $t(16) = -0.87$ ,  $P = 0.4$ ).

479

480 **MRI data acquisition and preprocessing.** *Data acquisition.* All the participants were scanned in a 3-Tesla Siemens  
481 Trio magnetic resonance imaging scanner using a 32-channel head coil (Siemens Medical Solutions, Erlangen,  
482 Germany) at ECNU. In each of the two experimental sessions, a total of 1,350 fMRI volumes were acquired for each  
483 subject across 4 runs. The functional images were acquired with the following sequence: TR = 2000 ms, TE = 30  
484 ms, field of view (FOV) =  $230 \times 230$  mm, flip angle =  $70^\circ$ , voxel size =  $3.6 \times 3.6 \times 4$  mm, 33 slices, scan orientation  
485 parallel to AC-PC plane. High-resolution T1-weighted MPRAGE anatomy images were also acquired (TR = 2530  
486 ms, TE = 2.34 ms, TI = 1100 ms, flip angle =  $7^\circ$ , FOV =  $256 \times 256$  mm, 192 sagittal slices, 0.9 mm thickness, voxel  
487 size =  $1 \times 1 \times 1$  mm).

488 *Preprocessing.* Preprocessing was conducted using SPM12 (<http://www.fil.ion.ucl.ac.uk/spm>). Scans were  
489 realigned to the middle EPI image. The structural image was co-registered to the mean functional image, and the  
490 parameters from the segmentation of the structural image were used to normalize the functional images that were  
491 resampled to  $3 \times 3 \times 3$  mm. The realigned normalized images were then smoothed with a Gaussian kernel of 8-mm  
492 full-width half maximum (FWHM) to conform to the assumptions of random field theory and improve sensitivity  
493 for group analyses (Friston et al., 2002). Data were analyzed using general linear models and representational  
494 similarity analyses as described below with a high-pass filter cutoff of 256 s and autoregressive AR(1) model  
495 correction for auto-correlation.

496

497 **Functional MRI data analysis.** *Parametric modulation analysis.* First-level models were performed on the fMRI  
498 data collected from the TMS-vertex session only (either all the trials altogether or separately for Across-chapter vs.  
499 Within-chapter conditions). In all of these models, each of the 240 trials was modeled with a canonical hemodynamic  
500 response function as an event-related response with a duration of 5 s.

501 For the TMS-vertex session as a whole (Across-chapter and Within-chapter trials collapsed), we performed  
502 three parametric modulation analyses (pmod), each with a different combination of modulatory regressor/regressors  
503 (namely, TD; TD + RT; SC). For the TD pmod, we assigned the actual TD values at encoding as the modulatory  
504 parameter, and used the polynomial function up to first order. Several regressors of no interest were also included:  
505 6 head movement regressors and 1 missing trial regressor (i.e., no-response trials; number of missing trials of Across-  
506 chapter condition:  $5.65 \pm 6.96$ , of Within-chapter condition:  $5.29 \pm 6.8$ ;  $n = 17$ , mean  $\pm$  sd) and the run mean. The  
507 purpose of this analysis was to test for any linear TD-dependent modulation of signal intensity in the brain between  
508 the TD between the two images at encoding and the brain activity during TOJ retrieval of the same events. For the  
509 TD + RT pmod, we aimed to identify the voxels whose activities changed as a function of TD after the removal of  
510 the influence of reaction time. Each subjects' RTs corresponding to each TD level were entered as the modulatory  
511 parameter, together with the regressors of no interest as above. For the Situational Change (SC) pmod, we tested for  
512 any linear SC-dependent modulation of signal intensity in the brain between the spatial displacement of two images  
513 at encoding and the brain activity during TOJ retrieval of the same pairs of images. We determined the numbers of  
514 situational change between the paired of images by analyzing all the subject-specific videos frame by frame to mark  
515 out the boundaries at which a situational location had changed (**Supplementary Fig. 4**), and entered these video-

516 specific and subject-specific SC values as the modulatory parameter.

517 For the Across-chapter vs. Within-chapter comparison, we also performed three pmod analyses with identical  
518 sets of regressors as described above (namely, TD; TD + RT; SC). We looked for changes in brain responses as a  
519 linear function of the regressor of interest (i.e., TD or SC). Maps were created by multiple regression analyses  
520 between the observed signals and regressors. The contrast maps from the first-level model of parametric analyses  
521 were taken for second-level group analyses and entered into one-sample *t*-tests. The group analyses were performed  
522 for each contrast using a random effects model (Penny & Holmes, 2004). The statistical threshold was set at  $p < 0.05$   
523 (FWE corrected) at cluster level and  $p < 0.001$  at an uncorrected peak level according to the SPM12 standard  
524 procedure. The activation cluster locations were indicated by the peak voxels on the normalized structural images  
525 and labeled using the nomenclature of Talairach and Tournoux (1988) (Talairach & Tournoux, 1988).

526 *Searchlight Representational Similarity Analysis (searchlight RSA)*. RSA were conducted using the RSA  
527 toolbox (<http://www.mrc-cbu.cam.ac.uk/methods-and-resources/toolboxes/>) on the fMRI data following  
528 realignment and normalization, but without smoothing. In the Across-chapter vs. Within-chapter comparison, each  
529 unique TD level was modeled with a separate regressor and was contrasted to produce a T-statistic map (spmT maps),  
530 creating 120 statistical maps in total (Across- vs. Within-chapter conditions; 2 repetitions for each TD level). For  
531 the TMS-vertex vs. TMS-precuneus comparison, we collapsed the trials in the Across- and Within-chapter  
532 conditions and generated 60 statistical maps in either of the two sessions (4 repetitions for each TD level). Using  
533 searchlight RSA, spherical searchlights with a radius of 9 mm (93 voxels, volume = 2,511 mm<sup>3</sup>) were extracted from  
534 the brain volume and then the data (i.e., signal intensity) for the 60 TD levels were Person product-moment (1 - *r*)  
535 correlated with every other levels to generate a representational dissimilarity matrix (RDM), reflecting the between-  
536 condition dissimilarity of BOLD signal response. These neural RDMs were then Spearman-rank correlated with a  
537 set of candidate RDMs (see **Supplementary Fig. 2a**), reflecting different predictions of the information carried by  
538 similarity structure of neural signal responses and generated correlational maps (*r*-maps). Finally, these *r*-maps were  
539 converted to *z*-maps using Fisher transformation. All the *z*-maps were then submitted to a group-level one-sample *t*-  
540 test to identify voxels in which the similarity between the predicted RDM and observed neural RDM was greater  
541 than zero. This allowed us to identify voxels in which information of TD at retrieval might be represented (see  
542 **Supplementary Fig. 2b**). The statistical threshold was set as identical to those employed in the univariate analysis,  
543 which was at  $p < 0.05$  (FWE corrected) at cluster level and  $p < 0.001$  at an uncorrected peak level.

544 *Leave-one-subject-out approach (LOSO), functional and anatomical ROIs*. We applied LOSO approach to  
545 create functional ROIs to avoid statistical bias (Esterman, Tamber-Rosenau, Chiu, & Yantis, 2010). For instance, in  
546 order to identify an ROI (i.e., conjunction mask in **Figure 2d**) for Subj01, we re-estimated the contrast using a one-  
547 sample *t*-test on the whole-brain searchlight *z*-maps obtained from Subj02 to Subj17. Likewise, we also re-estimated  
548 the contrast using a one-sample *t*-test on the contrast maps obtained from the Pmod analysis of Subj02 to Subj17.  
549 We set the same threshold reported above to extract clusters from these two statistical maps. We next overlaid the  
550 two resultant maps and extracted a conjunction region (mask01), with which we used to extract the value in the  
551 searchlight *z*-map from Subj01 for further statistical analysis. This procedure was repeated 17 times and generated  
552 17 different ROIs, which provided statistically independent regions to extract values for testing differences between  
553 conditions (**Figure 2e**). For the anatomical ROIs (depicted in **Figure 3** and **Supplementary Figure 8**), 7 regions  
554 (Hippocampus\_L; Hippocampus\_R; Precuneus\_L; Precuneus\_R; Angular\_L; Angular\_R; Occipital cortex) of AAL  
555 template (Tzourio-Mazoyer et al., 2002) were created as masks. We extracted and averaged the similarity value  
556 within these masks for each subject for statistical tests.

557

558 **Candidate representational dissimilarity matrices (RDM)**. *Model 1* (TD RDM, 60 × 60): We ranked the  
559 difference across the 60 TD levels, from the shortest to the longest TD, for the Within-chapter condition (or Across-



560 chapter condition, the two RDMs were identical because of their matched TD). We first log-transformed the subject-  
561 specified TD values for each pair of images and then computed the differences with and among every other TD  
562 levels producing  $60 \times 59/2$  values, which were then assigned to the corresponding cells of the RDM.

563 *Model 2* (Situational Change RDM,  $60 \times 60$ ): Since the temporal and spatial dimensions were closely inter-  
564 correlated. We checked whether the situational change might influence the neural patterns in those voxels that  
565 represent the TD information. We analyzed the subject-specific videos frame by frame and marked out the  
566 boundaries at which a situational location had changed (see illustration in **Supplementary Fig. 4**). Then we  
567 computed the numbers of situational changes contained in each of the paired images and then computed the  
568 differences with and among every other conditions producing  $60 \times 59/2$  values, which were then assigned to the  
569 corresponding cells of the RDM.

570 *Model 3* (RGB-cross-correlation,  $60 \times 60$ ), *Model 4* (RGB-intensity RDM,  $60 \times 60$ ) and *Model 5* (RGB-  
571 histogram RDM,  $60 \times 60$ ) considered the perceptual characteristics of the images used in TOJ. For model 3, the  
572 similarity measure was based on the cross-correlation value between two images (image of size  $1920 \times 1080$ ) for  
573 the three color channels (red, green, and blue; RGB). For every pair of images in each of the three color channels  
574 (RGB), we computed the cross-correlation coefficients between the pair. This is a measure of the displacement of  
575 one image relative to the other; the larger the cross-correlation coefficient (which ranges between -1 and 1), the more  
576 similar the two images was. We then computed the differences with and among every other conditions producing  $60$   
577  $\times 59/2$  values, which were then assigned to the corresponding cells of the RDM. For Model 4, we computed the  
578 pixel-wise difference between pair images for the three color channels (RGB). The computed difference is useful  
579 when the compared images are taken from a stationary camera with infinitesimal time difference. The output pixel  
580 for each color channel is assigned with the value 1 if the absolute difference between the corresponding pixels in the  
581 image pair is non-zero, or a value of 0 otherwise. A single value is generated for each of the three color channels by  
582 summing all the output pixel values (either 0 or 1). We averaged the sum of difference for all three color-channels  
583 for the intensity value of each pair of images and then computed the differences with and among every other  
584 conditions producing  $60 \times 59/2$  values, which were then assigned to the corresponding cells of the RDM. For Model  
585 5, we constructed color histograms for image pairs and computed the Sum-of-Square-Difference (SSD) error  
586 between them for the three color channels (RGB). For each color channel the intensity values range from 0 to 255  
587 (i.e., 256 bins), we first computed the total number of pixels at each intensity value and then computed the SSD for  
588 all 256 bins for each image pair. The smaller the value of the SSD, the more similar the two images (image pair)  
589 was. We then computed the differences with and among every other conditions producing  $60 \times 59/2$  values, which  
590 were then assigned to the corresponding cells of the RDM. In contrast to model 4, this approach does not require  
591 corresponding pixels in the image pair to be the same, but rather measures the existence of pixel intensity in both  
592 images. Overall, the three perceptual-similarity models (3, 4 and 5) look at different similarity measures and they  
593 complement each other; thus any difference in the appearance of the two images irrespective of the temporal distance,  
594 could be accounted for by at least one of the three models. For any two similar images, the RGB-intensity RDM  
595 results in a very small value, thus the corresponding pixels are virtually the same for the entire image. The RGB-  
596 histogram will also result in a small value as the image pairs will have the same histogram bins. The RGB-cross-  
597 correlation value will be close to 1, signifying the similarity in the images. When subsections of a scene are visible  
598 in both images with varied brightness, the RGB-cross-correlation value will still be closer to 1 but with a very high  
599 RGB-intensity RDM value.

600

601 **Behavioral data analysis.** To look into the TD-independent effects of precuneal disruption by TMS on memory  
602 performance, we collapsed the 60 TD levels for each subject and entered their percentage correct (ACC) or response  
603 times (RT) of the TMS sessions (TMS-vertex vs. TMS-precuneus) and the Context factor (Across-chapter vs.

604 Within-chapter) as within-subjects factors into repeated ANOVAs.

605

606 **Data and code availability.** Data and codes are available upon request.

607

608



609 **Supplementary information**

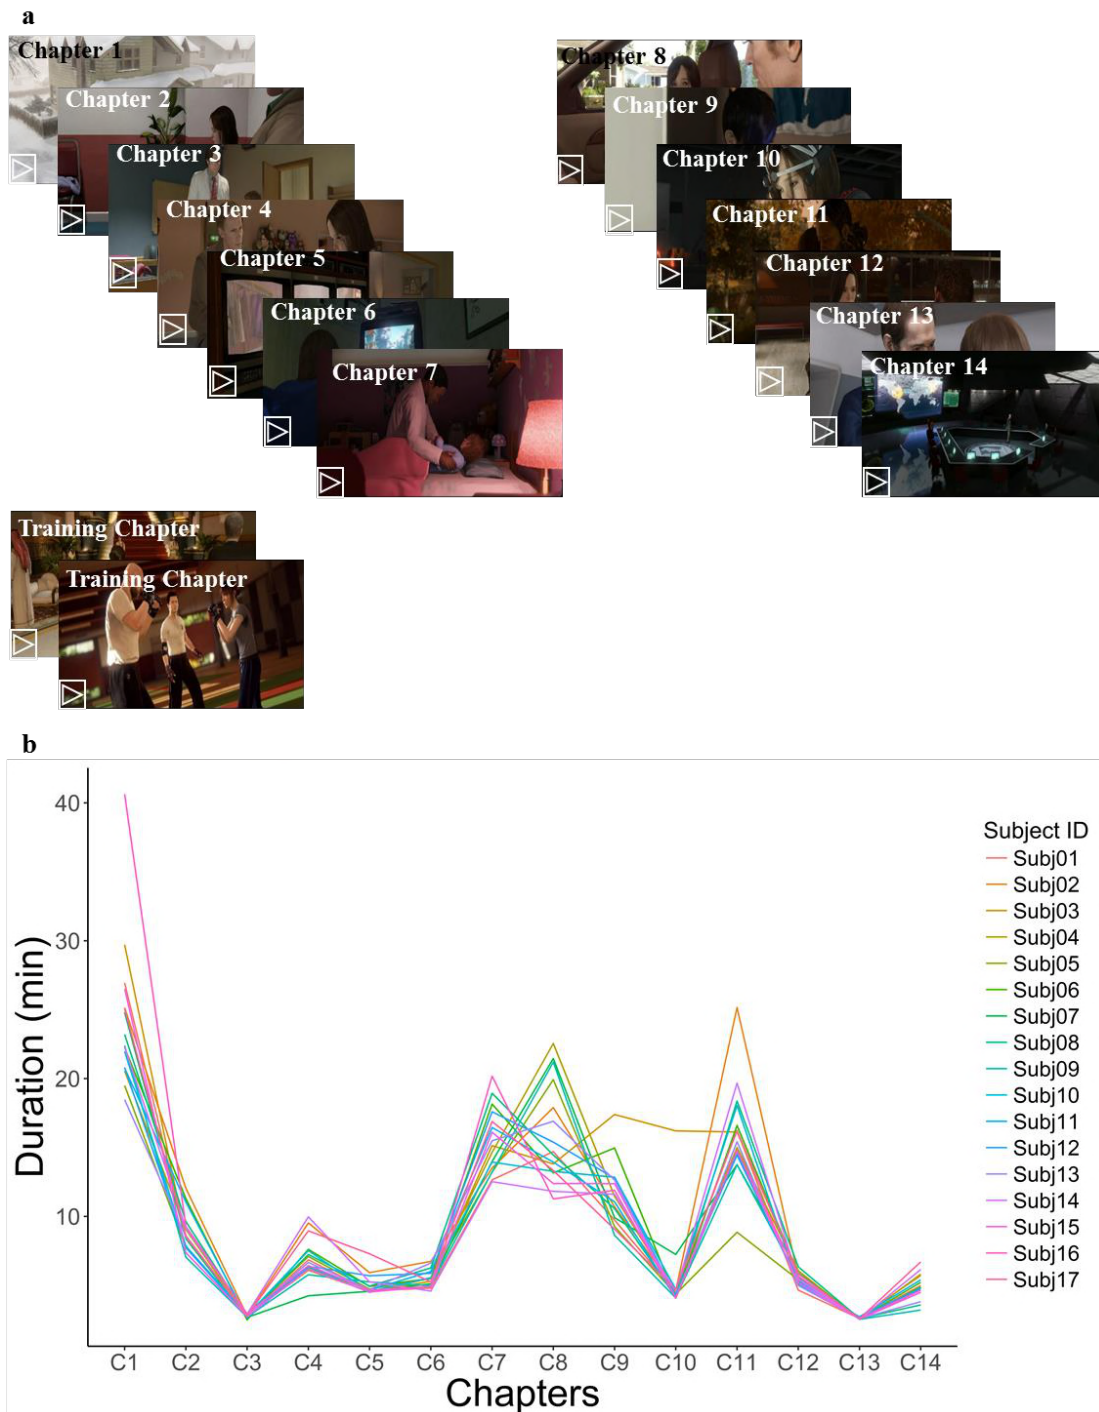

610

611

612 Supplementary Figure 1. Game chapters and playing durations of each chapter for the  
613 subjects. **(a)** 14 different chapters were used: seven in each of two within-subjects TMS  
614 sessions (see also **Supplementary Table 1**). **(b)** While the playing durations varied  
615 across chapters and subjects, the numbers of paired images extracted for the TOJ task  
616 were approximately equal across the chapters.

617

618

619

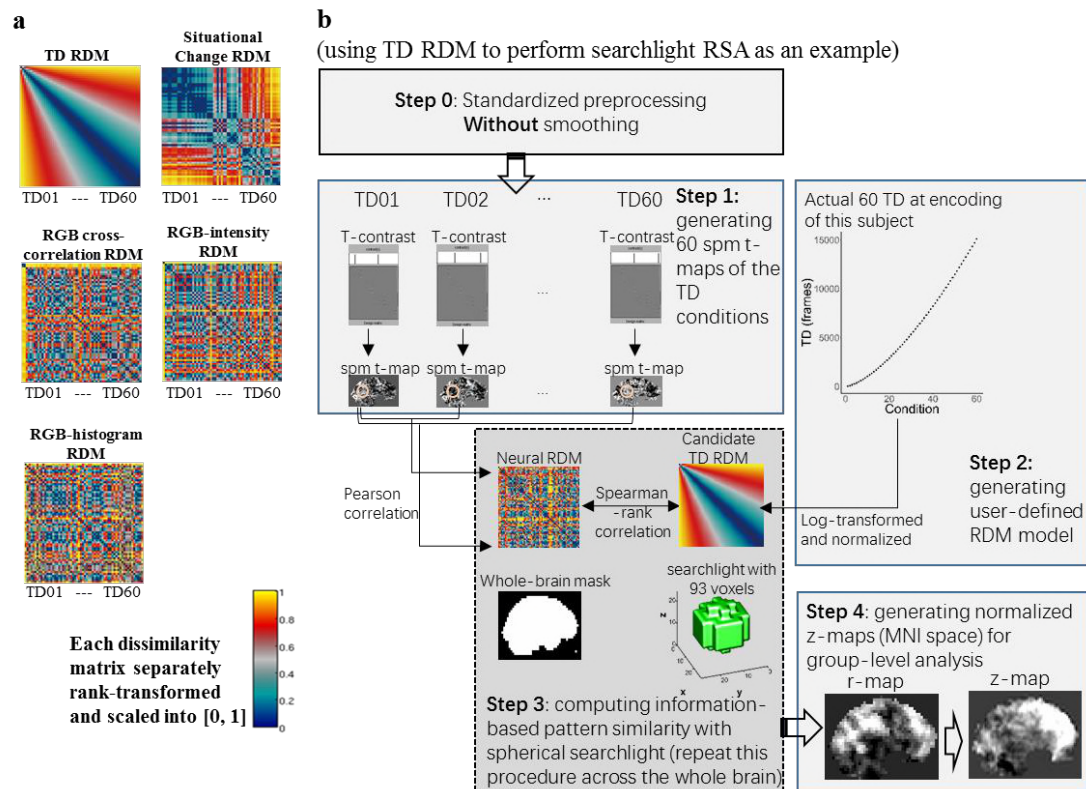

620

621

622 Supplementary Figure 2. Candidate RDMs and pipeline of RSA analysis. **(a)** Candidate  
 623 RDMs for RSA searchlight analyses, including TD RDM, Situational Change RDM,  
 624 RGB cross-correlation RDM, RGB-intensity RDM, and RGB-histogram RDM. Data  
 625 depicted in these RDMs were extracted from one subject (Subj01). **(b)** Using one model  
 626 (TD RDM) to perform the searchlight procedure as an example in one subject (Subj01).  
 627 The same principle and procedure applied to all other candidate RDMs and subjects.

628

629

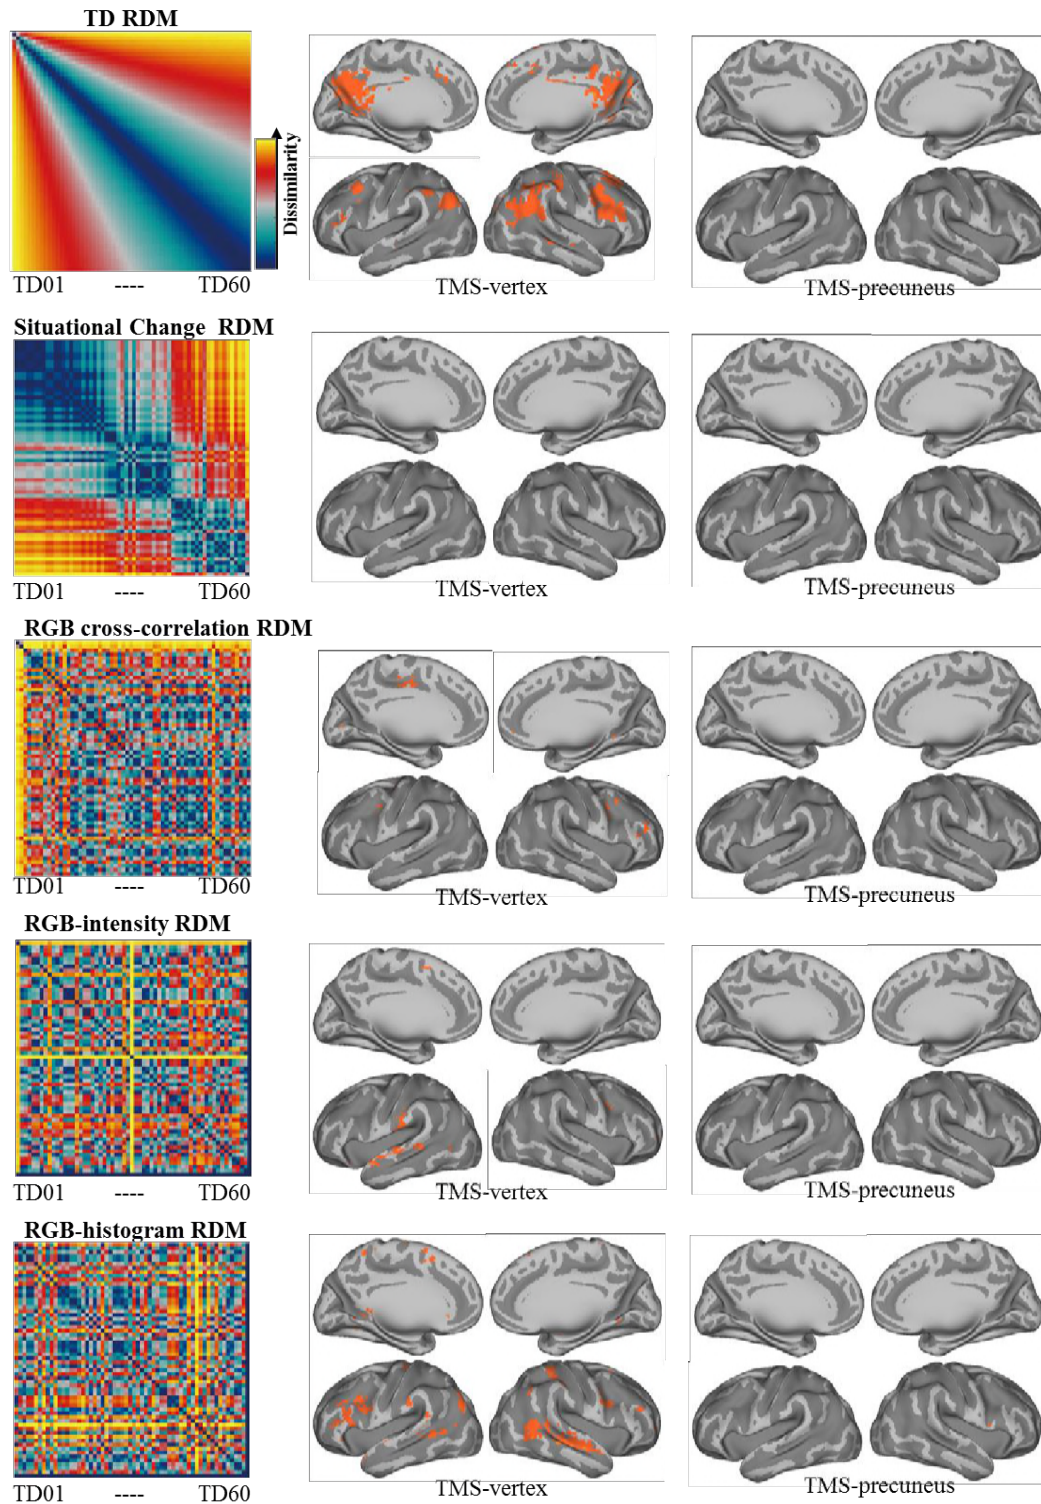

630

631 Supplementary Figure 3. RSA searchlight results for TMS-vertex and TMS-precuneus  
632 sessions using candidate RDMs (TD RDM; Situational Change RDM; RGB cross-  
633 correlation RDM; RGB-intensity RDM; RGB-histogram RDM). TD representation  
634 (top row and cf. **Fig. 2b**) was not found in the other control candidate RDMs (rows 2 –  
635 5). For illustration purpose, we generated these RDMs using one participant's video  
636 and TOJ paired-images from his TMS-vertex session (Subj01). MRI results are  
637 displayed at  $P_{\text{uncorrected}} < 0.001$ .

situational change

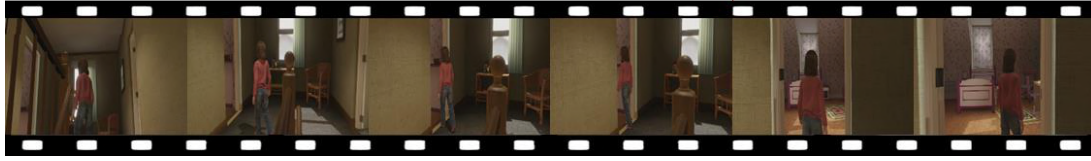

638

639

640 Supplementary Figure 4. An excerpt of a subject-specific video illustrates how  
641 situational changes were defined frame-by-frame for Situational Change RDMs and  
642 pmod analyses. Noting that time and space in our task were partially correlated, we  
643 quantified subject-specific situational changes in terms of the number of locations each  
644 participant had traversed in the video (i.e., spatial displacement embedded in the paired  
645 images presented in TOJ task).

646

647



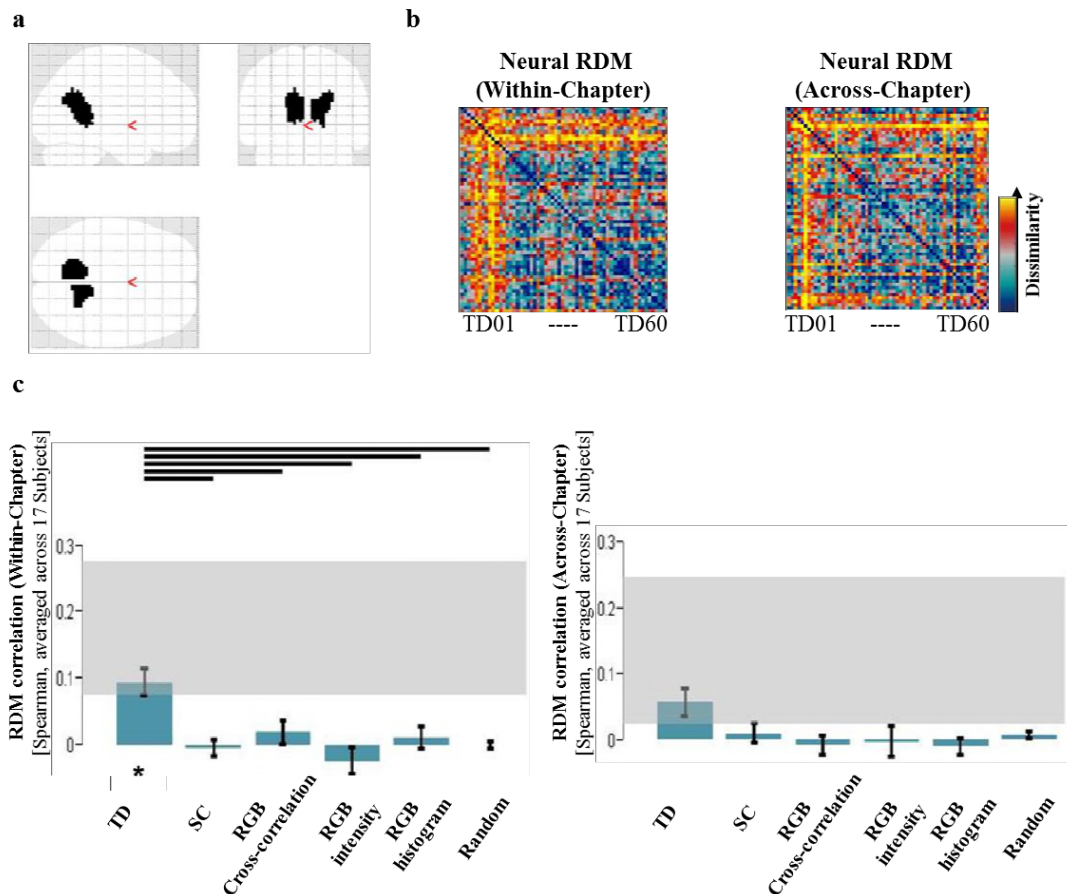

648

649 Supplementary Figure 5. **(a)** Conjunction region for extracting neural signals. **(b)**  
650 Neural RDMs averaged across 17 subjects for Within-chapter and Across-chapter  
651 conditions. **(c)** Candidate RDMs (TD, SC, RGB cross-correlation, RGB intensity, RGB  
652 histogram, Random) are tested and compared for their ability to explain the Neural  
653 RDM in Within-chapter and Across-chapter conditions. As expected, the TD RDM is  
654 the most correlated candidate RDM to the Neural RDM in the Within-chapter condition.

655 \*  $P < 0.05$ , FDR corrected.

656

657

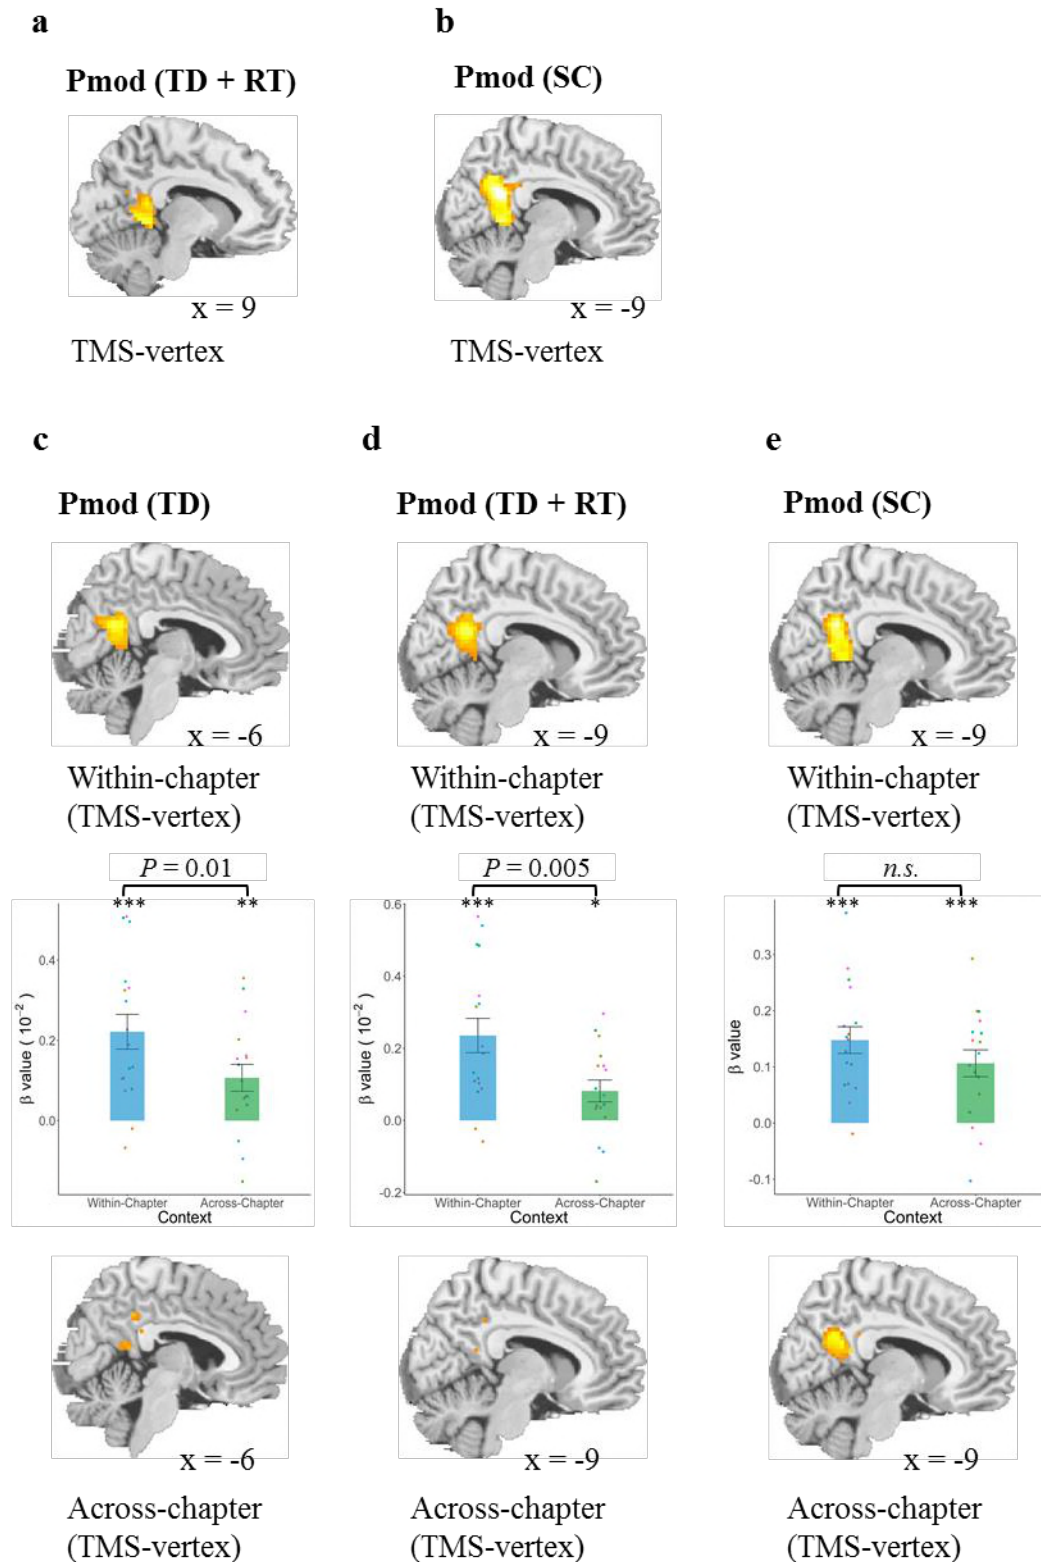

658

659 Supplementary Figure 6. Whole-brain parametric modulation analyses with different  
660 regressors (temporal distance (TD), reaction times (RT), and situational change (SC)).

661 **(a)** Temporal distance and RT as modulatory regressors for TMS-vertex session  
662 (Within-chapter and Across-chapter conditions collapsed). Having removed the  
663 influence of RT, neural activity in the precuneus/retrosplenial cortex and posterior

664 hippocampus increased with TD. **(b)** Situational changes as a modulatory regressor for  
665 TMS-vertex session. Neural activity in the precuneus/retrosplenial cortex and posterior  
666 cingulate cortex increased with the number of situational changes. **(c)** TD as a  
667 modulatory regressor separately for Within-chapter (upper) and Across-chapter (bottom)  
668 conditions of TMS-vertex session. Neural activity in the precuneus, extending into the  
669 retrosplenial cortex and posterior cingulate cortex increased linearly with TD in Within-  
670 chapter condition. The  $\beta$  values extracted from the cluster was higher in the Within-  
671 chapter condition than in the Across-chapter condition,  $P = 0.01$ . **(d)** TD and reaction  
672 time (RT) as modulatory regressors separately for Within-chapter (upper) and Across-  
673 chapter (bottom) conditions of TMS-vertex session. After having removed the influence  
674 of RT, neural activity in the precuneus, extending into the retrosplenial cortex and  
675 posterior cingulate cortex, remained linearly associated with TD in Within-chapter  
676 condition. The  $\beta$  values extracted from the cluster was also higher in the Within-chapter  
677 condition than in the Across-chapter condition,  $P = 0.005$ . **(e)** SC as a modulatory  
678 regressor separately for Within-chapter and Across-chapter conditions of TMS-vertex  
679 session. Neural activity in the precuneus/retrosplenial cortex and posterior cingulate  
680 cortex increased with the number of situational changes in both conditions. No  
681 significant difference was found in  $\beta$  values between the two conditions. In the present  
682 study the anterior part of the precuneus (including the retrosplenial cortex) was engaged,  
683 whereas in previous studies the more dorsal/posterior region of the precuneus was  
684 activated (Kwok et al., 2012; St Jacques et al., 2008). This might stem from the fact  
685 that the encoding done here during gameplay being different from those involved in  
686 watching TV episodes (Kwok et al., 2012) or experiencing a self-guided tour (St Jacques  
687 et al., 2008). For visualization purposes, the threshold was set at  $P_{\text{uncorrect}} < 0.001$ .  
688



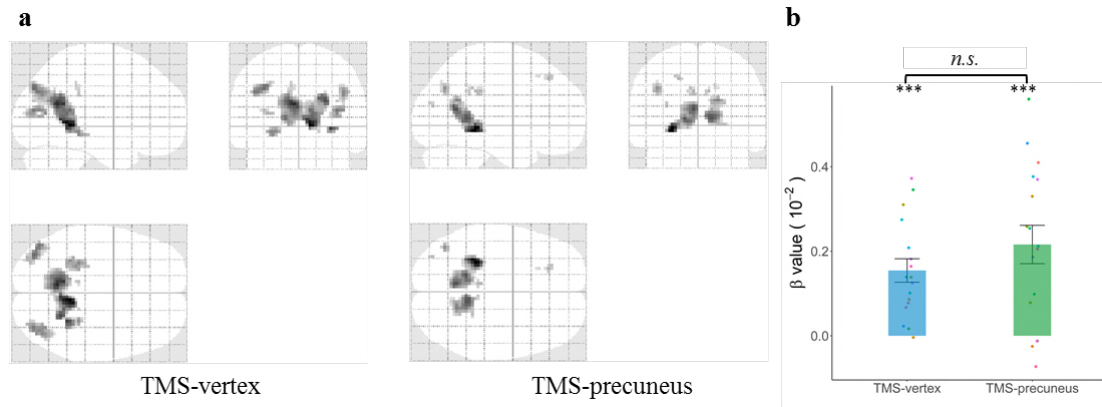

689

690

691 Supplementary Figure 7. **(a)** In contrast to the removal of the multivoxel representation,

692 TMS to the precuneus did not impact on the activation intensity in the precuneus and

693 retrosplenial cortex. **(b)** Activation in these clusters (containing the precuneus)

694 increased with temporal distance irrespective of TMS stimulation. Activation maps are

695 displayed at  $P_{\text{uncorrected}} < 0.001$ .

696

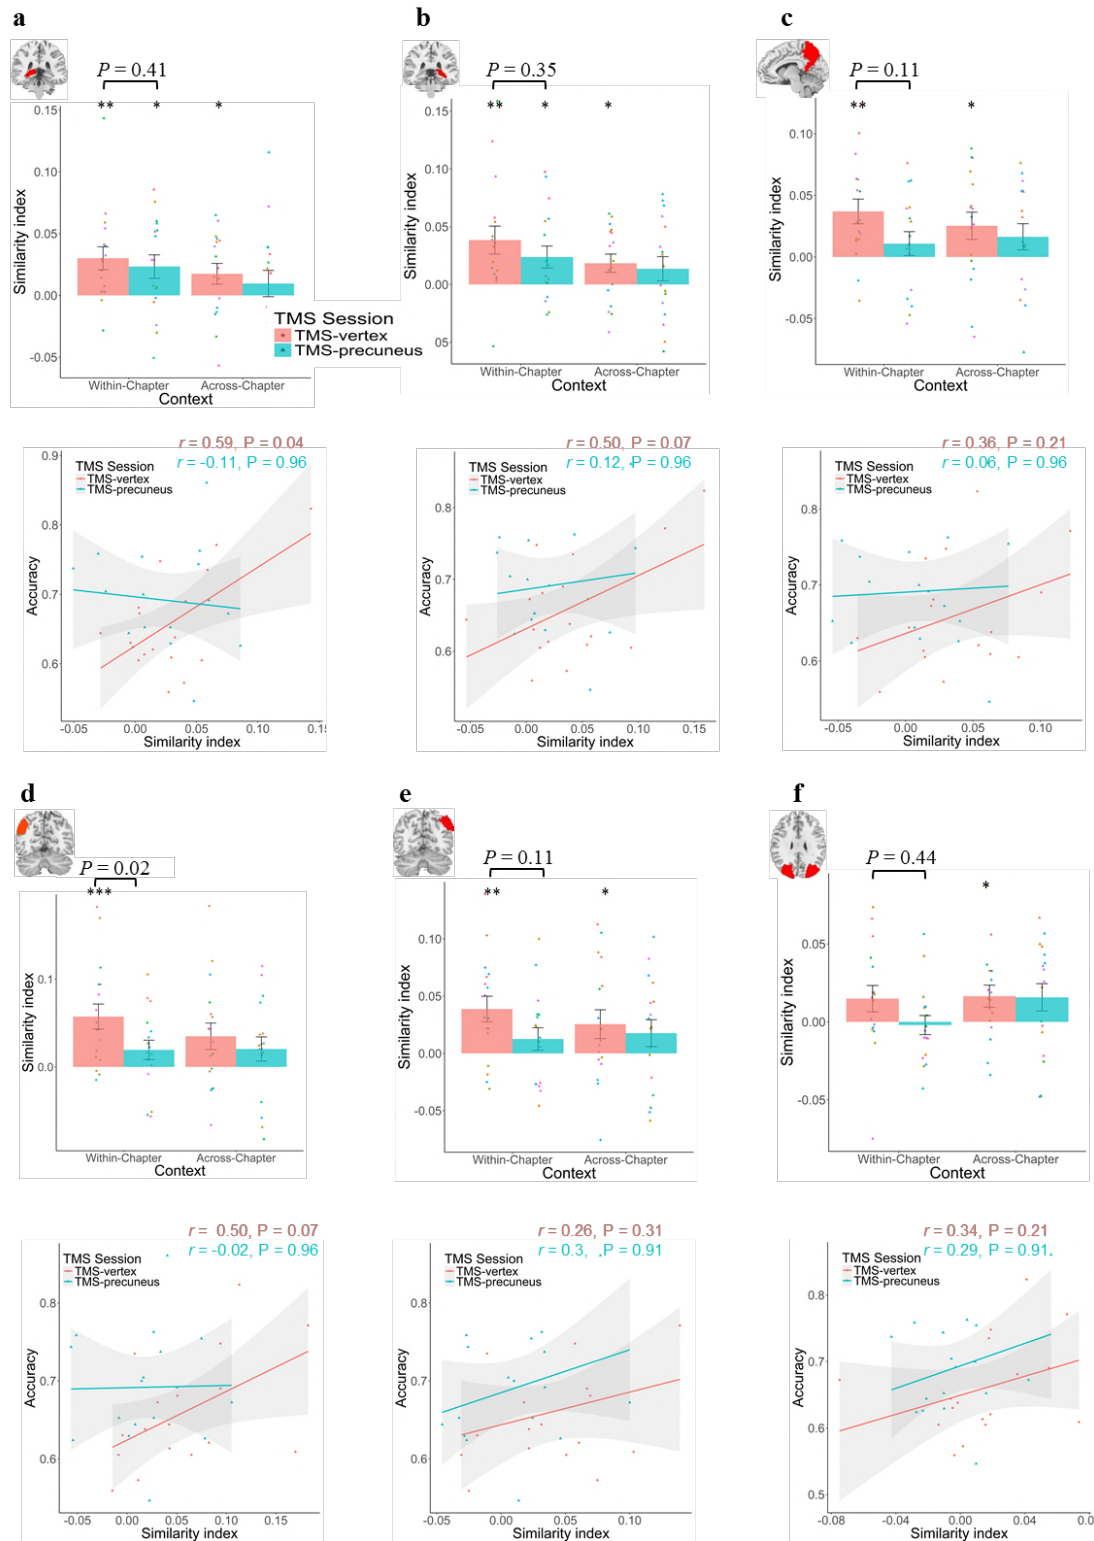

697

698

699 Supplementary Figure 8. Similarity indices in six ROIs (a-b: bilateral hippocampus, c:  
700 right precuneus, d-e: bilateral angular gyrus, and f: whole occipital cortex) in both TMS  
701 sessions, and their correlation with subjects TOJ accuracy for Within-chapter trials. P  
702 values are FDR-corrected.

703

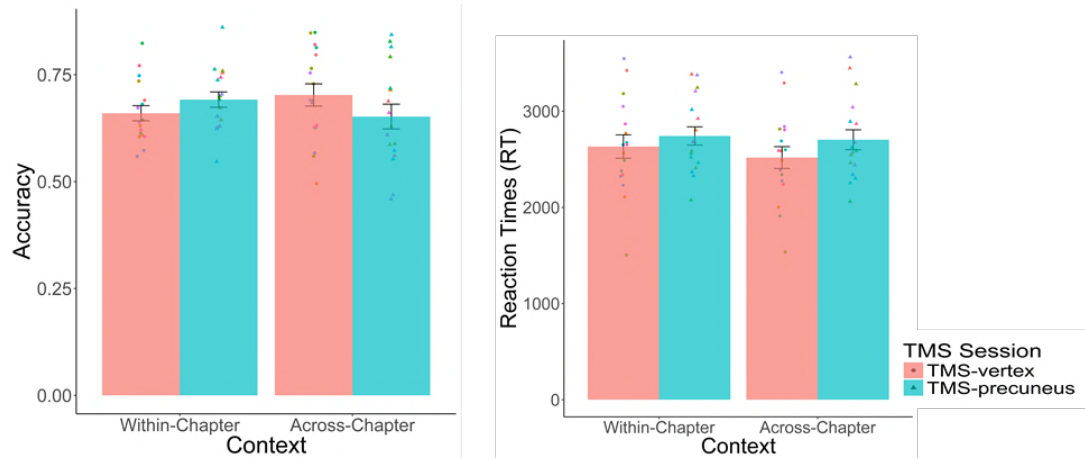

704

705

706 Supplementary Figure 9. Memory performance of TOJ task. Behavioral results  
707 (Accuracy and RT) of TOJ task by TMS stimulation sites and Context (60 TD levels  
708 collapsed). TMS to the precuneus did not result in any retrograde memory amnesia ( $P_s >$   
709 0.05), but resulted in a slight slowing in retrieval times (main effect of TMS:  $F(1, 16)$   
710 = 5.45,  $P = 0.03$ ,  $\eta^2 = 2.8\%$ ; interaction effect:  $P = 0.2$ ) as compared with the TMS-  
711 vertex condition.

712

713 Supplementary Table 1. Descriptive statistics of TMS motor threshold and full counter-  
 714 balancing for gameplay chapters by TMS sites.

| ID     | Motor<br>thresh<br>old | Session 1             |                   |           | Delay<br>(days) | Session 2             |                   |           |
|--------|------------------------|-----------------------|-------------------|-----------|-----------------|-----------------------|-------------------|-----------|
|        |                        | Chapters<br>(Playing) | Duration<br>(min) | TMS Site  |                 | Chapters<br>(Playing) | Duration<br>(min) | TMS Site  |
| Subj01 | 66%                    | Chap 1 ~ 7            | 89.39             | Precuneus | 9               | Chap 8 ~ 14           | 35.19             | Vertex    |
| Subj02 | 67%                    | Chap 1 ~ 7            | 102.70            | Vertex    | 6               | Chap 8 ~ 14           | 44.46             | Precuneus |
| Subj03 | 80%                    | Chap 8 ~ 14           | 35.53             | Vertex    | 9               | Chap 1 ~ 7            | 114.21            | Precuneus |
| Subj04 | 58%                    | Chap 8 ~ 14           | 36.41             | Vertex    | 2               | Chap 1 ~ 7            | 94.70             | Precuneus |
| Subj05 | 65%                    | Chap 1 ~ 7            | 80.50             | Precuneus | 8               | Chap 8 ~ 14           | 35.31             | Vertex    |
| Subj06 | 67%                    | Chap 1 ~ 7            | 95.05             | Vertex    | 3               | Chap 8 ~ 14           | 39.63             | Precuneus |
| Subj07 | 72%                    | Chap 8 ~ 14           | 32.41             | Vertex    | 4               | Chap 1 ~ 7            | 97.06             | Precuneus |
| Subj08 | 73%                    | Chap 1 ~ 7            | 96.08             | Precuneus | 8               | Chap 8 ~ 14           | 37.03             | Vertex    |
| Subj09 | 69%                    | Chap 1 ~ 7            | 88.81             | Vertex    | 7               | Chap 8 ~ 14           | 31.46             | Precuneus |
| Subj10 | 80%                    | Chap 8 ~ 14           | 35.69             | Precuneus | 7               | Chap 1 ~ 7            | 89.79             | Vertex    |
| Subj11 | 65%                    | Chap 8 ~ 14           | 38.77             | Vertex    | 26              | Chap 1 ~ 7            | 86.02             | Precuneus |
| Subj12 | 71%                    | Chap 1 ~ 7            | 90.56             | Precuneus | 16              | Chap 8 ~ 14           | 35.89             | Vertex    |
| Subj13 | 68%                    | Chap 8 ~ 14           | 35.66             | Vertex    | 7               | Chap 1 ~ 7            | 87.98             | Precuneus |
| Subj14 | 73%                    | Chap 1 ~ 7            | 87.94             | Precuneus | 7               | Chap 8 ~ 14           | 40.56             | Vertex    |
| Subj15 | 57%                    | Chap 8 ~ 14           | 32.72             | Precuneus | 5               | Chap 1 ~ 7            | 91.46             | Vertex    |
| Subj16 | 69%                    | Chap 8 ~ 14           | 35.44             | Vertex    | 5               | Chap 1 ~ 7            | 108.49            | Precuneus |
| Subj17 | 61%                    | Chap 1 ~ 7            | 91.10             | Precuneus | 6               | Chap 8 ~ 14           | 42.13             | Vertex    |

715

716

717 Supplementary Table 2. Brain representation associated with TD RDM in TMS-vertex  
 718 session (cf. Figure 2b).

| Cluster |       | peak |    |    | % Cluster | Brain regions        |
|---------|-------|------|----|----|-----------|----------------------|
| k       | p-FWE | X    | y  | z  |           |                      |
| 7554    | <.001 | 30   | 21 | 38 | 5.41      | Precuneus_L          |
|         |       |      |    |    | 5.32      | Precuneus_R          |
|         |       |      |    |    | 4.38      | Frontal_Mid_2_R      |
|         |       |      |    |    | 3.34      | Angular_R            |
|         |       |      |    |    | 3.24      | Parietal_Inf_L       |
|         |       |      |    |    | 3.15      | Frontal_Inf_Tri_R    |
|         |       |      |    |    | 2.99      | Parietal_Inf_R       |
|         |       |      |    |    | 2.91      | Frontal_Mid_2_L      |
|         |       |      |    |    | 2.83      | Frontal_Inf_Tri_L    |
|         |       |      |    |    | 2.74      | Angular_L            |
|         |       |      |    |    | 2.73      | SupraMarginal_R      |
|         |       |      |    |    | 2.73      | Frontal_Inf_Oper_R   |
|         |       |      |    |    | 2.65      | Frontal_Sup_2_R      |
|         |       |      |    |    | 2.61      | Cuneus_L             |
|         |       |      |    |    | 2.58      | Cingulate_Mid_R      |
|         |       |      |    |    | 2.57      | Postcentral_R        |
|         |       |      |    |    | 2.55      | Temporal_Mid_R       |
|         |       |      |    |    | 2.26      | Calcarine_L          |
|         |       |      |    |    | 2.22      | Cuneus_R             |
|         |       |      |    |    | 1.87      | Precentral_R         |
|         |       |      |    |    | 1.85      | Occipital_Mid_R      |
|         |       |      |    |    | 1.62      | Calcarine_R          |
|         |       |      |    |    | 1.62      | Frontal_Sup_Medial_R |
|         |       |      |    |    | 1.56      | Cingulate_Mid_L      |
|         |       |      |    |    | 1.52      | Occipital_Sup_R      |
|         |       |      |    |    | 1.47      | Frontal_Sup_Medial_L |
|         |       |      |    |    | 1.42      | Temporal_Sup_R       |
|         |       |      |    |    | 1.22      | Occipital_Mid_L      |
|         |       |      |    |    | 1.02      | Cingulate_Post_L     |
|         |       |      |    |    | 1.01      | Precentral_L         |

719 Note. % Cluster denotes percentage of voxels of the cluster that is contained in each of the anatomical regions  
 720 (Tzourio-Mazoyer et al., 2002).

721

722 Supplementary Table 3. Brain activation parametrically modulated by temporal  
 723 distance (TD) in TMS-vertex session (cf. Figure 2c).

| Regressor | Cluster          |       | Voxel   |    |     |    | Brain Regions   |
|-----------|------------------|-------|---------|----|-----|----|-----------------|
|           | k                | p-FWE | Z value | x  | Y   | z  |                 |
| TD        | 555              | <.001 | 4.62    | 9  | -45 | -1 | Cerebelum_4_5_R |
|           |                  |       | 4.35    | -6 | -57 | 20 | Precuneus_L     |
|           |                  |       | 4.27    | 6  | -54 | 5  | Vermis_4_5      |
|           | 116              | .002  | 3.87    | 36 | -81 | 14 | Occipital_Mid_L |
|           |                  |       | 3.78    | 42 | -72 | 29 | Occipital_Mid_L |
|           |                  |       | 3.75    | 36 | -69 | 11 | Occipital_Mid_R |
|           | 117 <sup>†</sup> | .01   | 4.34    | 45 | -36 | 5  | Temporal_Sup_R  |
|           |                  |       | 4.17    | 54 | -36 | 5  | Temporal_Sup_R  |
|           |                  |       | 3.81    | 48 | -27 | -1 | Temporal_Sup_R  |

724 Note. <sup>†</sup> denotes a negative relationship between TD and brain activity.

725

726
